# Supplementary material for: Interleukin 26 Induces Macrophage IL-9 Expression in Rheumatoid Arthritis
Source: MDPI journal article supplement (doi:10.3390/ijms24087526), 2023-04-19
Supplement: s1 [file s1]

## Supplementary Figure

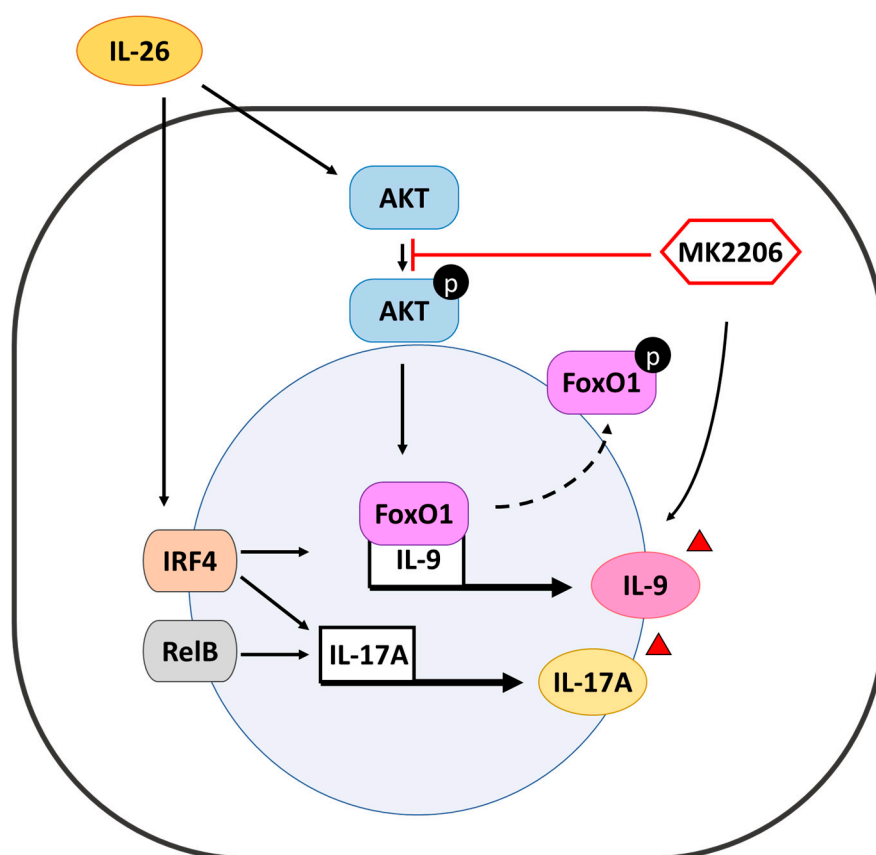

**Figure S1.** The diagram and mechanisms of IL26 stimulates macrophages. IL-26 stimulation promotes macrophage cells upregulates IL-9 and IL-17A expression by activating IRF4 and AKT-FoxO1 pathway. Blockage of activating AKT inclines the phospho-FoxO1 to functional FoxO1 and increases IL-9 expression.

## Supplementary Tables

**Table S1. Primary antibodies**

|                                    |                                                        |
|------------------------------------|--------------------------------------------------------|
| FITC anti-mouse CD80               | 104706, Biolegend, San Diego, CA, USA                  |
| PE anti-mouse IL-9                 | 514104, Biolegend, San Diego, CA, USA                  |
| Alexa Fluor® 647 anti-mouse IL-17A | 506912, Biolegend, San Diego, CA, USA                  |
| FITC anti-human CD80               | 305206, Biolegend, San Diego, CA, USA                  |
| PerCP/Cyanine5.5 anti-human IL-9   | 507610, Biolegend, San Diego, CA, USA                  |
| PE anti-mouse IL-17A               | 506904, Biolegend, San Diego, CA, USA                  |
| APC anti-human CD14                | 301808, Biolegend, San Diego, CA, USA                  |
| CD68 Monoclonal Antibody, FITC     | 11-0689-41, Thermo Fisher Scientific, Waltham, MA, USA |
| Rabbit anti IL9 Antibody           | DF2532, Affinity Biosciences, Jiangsu province, China. |
| Mouse anti IL26/AK155              | MAB1375, R&D Systems, Minneapolis, MN USA              |
| Rabbit anti IRF4                   | #4948, Cell Signal, Danvers, MA, USA                   |

|                                  |                                        |
|----------------------------------|----------------------------------------|
| Mouse anti RelB                  | sc-48366, Santa Cruz, Dallas, TX, USA  |
| Mouse anti PU.1                  | sc-390659, Santa Cruz, Dallas, TX, USA |
| Rabbit anti mouse ROR $\gamma$ T | ab207082, Abcam, Cambridge, UK         |
| Mouse anti AKT1                  | 680302, Biolegend, San Diego, CA, USA  |
| Rabbit anti p-AKT1 (S473)        | ab81283, Abcam, Cambridge, UK          |
| Rabbit anti GAPDH                | #5174, Cell Signal, Danvers, MA, USA   |

**Table S2. Secondary antibodies for western blot**

|                                                         |                                                          |
|---------------------------------------------------------|----------------------------------------------------------|
| Goat Anti-Mouse IgG (H+L)                               | 115-035-003, Jackson ImmunoResearch, West Grove, PA, USA |
| Goat Anti-Rabbit IgG (H+L)                              | 111-035-003, Jackson ImmunoResearch, West Grove, PA, USA |
| Alexa Fluor® 594 AffiniPure Donkey Anti-Mouse IgG (H+L) | 715-585-150, Jackson ImmunoResearch, West Grove, PA, USA |

**Table S3. Primer for Real Time-PCR**

| Target                   | Sequence                 |
|--------------------------|--------------------------|
| m_IRF4 Forward           | CCTCTTCAAGGCTTGGGCAT     |
| m_IRF4 Reverse           | TCAGGGGCATAATCCCTCCA     |
| m_RelB Forward           | GGTCTCCAGGACCACAGAAAT    |
| m_RelB Reverse           | CTGTGATGACCAGGTACGGC     |
| m_PU.1 Forward           | AACCAAGTCATCCGATGGAGGG   |
| m_PU.1 Reverse           | GCCCTGCAATGTCAAGGGAG     |
| m_ROR $\gamma$ T Forward | TACCCTACTGAGGAGGACAGG    |
| m_ROR $\gamma$ T Reverse | TTGACAGCATCTCGGGACA      |
| m_GAPDH Forward          | ACAGTCTTCTGGGTGGCAGTGAT  |
| m_GAPDH Reverse          | GTGAGGCCGGTGCTGAGTATGT   |
| h_IRF4 Forward           | GCCAAGATTCCAGGTGACTC     |
| h_IRF4 Reverse           | CTGGCTAGCAGAGGTTCTACG    |
| h_RelB Forward           | GGAAGTAGACATGAATGTGGTGAG |
| h_RelB Reverse           | GCTCTGATGTGTTTGTGGATTT   |
| h_PU.1 Forward           | CCTGAGGGGCTCTGCATTG      |
| h_PU.1 Reverse           | GAAGTCCCAGTAATGGTCGCT    |
| h_ROR $\gamma$ T Forward | GCACCCCTCACAGGTGATAA     |
| h_ROR $\gamma$ T Reverse | GAGAGCTAGGTGCAGAGCTT     |
| h_GAPDH Forward          | AGCCACATCGCTCAGACAC      |
| h_GAPDH Reverse          | GCCCAATACGACCAAATCC      |
